# Supplementary material for: Breastfeeding and Cardiovascular Disease Hospitalization and Mortality in Parous Women: Evidence From a Large Australian Cohort Study
Source: PubMed Central journal article supplement — J Am Heart Assoc. 2019 Mar 15;8(6):e011056. doi: 10.1161/JAHA.118.011056 (PMC6475066; doi:10.1161/jaha.118.011056), 2019-03-15
Supplement: JAH3-8-e011056-s001.pdf [file JAH3-8-e011056-s001.pdf]

# **SUPPLEMENTAL MATERIAL**

**Table S1. Baseline lifestyle, medical and reproductive characteristics of parous women (n=100,864) in the 45 and Up Study by breastfeeding history and average breastfeeding duration per child.\***

| Variables                                                         | Breastfeeding history |                   |                      | Average breastfeeding duration per child <sup>†</sup> |                  |                |                      |
|-------------------------------------------------------------------|-----------------------|-------------------|----------------------|-------------------------------------------------------|------------------|----------------|----------------------|
|                                                                   | Never<br>breastfed    | Ever<br>breastfed | P-value <sup>‡</sup> | >0-6<br>months                                        | >6-12<br>months  | >12<br>months  | P-value <sup>§</sup> |
| Number of subjects (%)                                            | 12,517<br>(12.4)      | 88,347<br>(87.6)  |                      | 56,049<br>(63.4)                                      | 24,549<br>(27.8) | 7,749<br>(8.8) |                      |
| <i>BMI category<sup>  </sup> (%)</i>                              |                       |                   |                      |                                                       |                  |                |                      |
| Underweight/healthy weight<br>(≤18.5 to <25.0 kg/m <sup>2</sup> ) | 38.8                  | 45.2              | <0.0001              | 42.6                                                  | 48.8             | 52.7           | <0.0001              |
| Overweight (25.0 to <30.0 kg/m <sup>2</sup> )                     | 33.0                  | 33.4              |                      | 23.2                                                  | 18.5             | 17.5           |                      |
| Obese (≥30.0 kg/m <sup>2</sup> )                                  | 28.2                  | 21.4              |                      | 24.2                                                  | 21.2             | 19.6           |                      |
| Mean (SD) physical activity time<br>(minutes/week)                | 599 (711)             | 602 (650)         | 0.68                 | 601 (662)                                             | 601 (629)        | 606 (627)      | 0.90                 |

*Physical activity category<sup>¶</sup> (%)*

|                         |      |      |         |      |      |      |         |
|-------------------------|------|------|---------|------|------|------|---------|
| <150 minutes/week       | 26.8 | 21.2 | <0.0001 | 22.8 | 19.0 | 16.5 | <0.0001 |
| 150 to 299 minutes/week | 14.8 | 16.0 |         | 15.6 | 16.4 | 18.1 |         |
| ≥300 minutes/week       | 58.4 | 62.8 |         | 61.6 | 64.6 | 65.4 |         |

*Smoking status<sup>\*\*</sup> (%)*

|                     |      |      |         |      |      |      |         |
|---------------------|------|------|---------|------|------|------|---------|
| Never smoker        | 60.5 | 65.5 | <0.0001 | 63.9 | 69.0 | 65.6 | <0.0001 |
| Past regular smoker | 28.8 | 28.0 |         | 28.7 | 26.1 | 29.1 |         |
| Current smoker      | 10.6 | 6.5  |         | 7.4  | 4.9  | 5.3  |         |

*Current alcohol intake*

*(drinks/week)<sup>††</sup> (%)*

|                 |      |      |         |      |      |      |         |
|-----------------|------|------|---------|------|------|------|---------|
| ≤14 drinks/week | 90.5 | 89.7 | <0.0001 | 89.3 | 90.3 | 91.1 | <0.0001 |
| >14 drinks/week | 9.5  | 10.3 |         | 10.7 | 9.7  | 8.9  |         |

*Healthy lifestyle index<sup>‡‡</sup>*

|         |      |      |         |      |      |      |         |
|---------|------|------|---------|------|------|------|---------|
| Healthy | 72.7 | 63.5 | <0.0001 | 66.6 | 59.1 | 56.5 | <0.0001 |
|---------|------|------|---------|------|------|------|---------|

|                                                                   |      |      |         |      |      |      |         |
|-------------------------------------------------------------------|------|------|---------|------|------|------|---------|
| Not healthy                                                       | 27.3 | 36.5 |         | 33.4 | 40.9 | 43.5 |         |
| Current use of multivitamins (%)                                  | 25.5 | 30.1 | <0.0001 | 29.2 | 30.6 | 34.6 | <0.0001 |
| Current use of omega 3 or fish oil (%) <sup>§§</sup>              | 34.2 | 37.0 | <0.0001 | 38.0 | 35.5 | 34.8 | <0.0001 |
| Current use of aspirin <sup>    </sup> (%)                        | 14.7 | 13.3 | <0.0001 | 14.8 | 11.5 | 7.6  | <0.0001 |
| History of oral contraceptive use <sup>¶¶</sup> (%)               | 80.1 | 83.6 | <0.0001 | 83.0 | 83.4 | 89.3 | <0.0001 |
| Family history of cardiovascular disease <sup>***</sup> (%)       | 58.1 | 57.9 | 0.78    | 59.0 | 55.9 | 56.3 | <0.0001 |
| Family history of hypertension <sup>†††</sup> (%)                 | 54.7 | 56.1 | 0.004   | 55.4 | 56.4 | 60.0 | <0.0001 |
| Family history of diabetes <sup>†††</sup> (%)                     | 27.0 | 24.0 | <0.0001 | 24.5 | 23.1 | 24.2 | <0.0001 |
| Self-reported hypertension/ recent treatment for hypertension (%) | 24.9 | 20.5 | <0.0001 | 23.2 | 17.6 | 10.6 | <0.0001 |

|                                                           |     |     |         |     |     |     |         |
|-----------------------------------------------------------|-----|-----|---------|-----|-----|-----|---------|
| Self-reported diabetes/ recent treatment for diabetes (%) | 9.8 | 5.6 | <0.0001 | 6.4 | 4.6 | 3.5 | <0.0001 |
|-----------------------------------------------------------|-----|-----|---------|-----|-----|-----|---------|

---

BMI= body mass index; SD=standard deviation.

\* Data are presented as means (SD) or percentages.

† Average breastfeeding duration per child was calculated as self-reported lifetime breastfeeding duration divided by the reported number of children.

‡ Based on chi-square test for categorical variables and student t-test for continuous variables.

§ Based on chi-square test for categorical variables and F statistics from ANOVA for continuous variables.

|| 8,273 missing.

¶ 1,370 missing.

\*\* 5 missing.

†† 2,091 missing.

‡‡ 15,623 missing. Based on six lifestyle risk factors scored individually as either healthy (score=1) or not healthy (score=0), as follows: body mass index (<25 kg/m<sup>2</sup>=score 1, ≥25 kg/m<sup>2</sup>=score 0), physical activity level (<150 min/week=score 0; ≥150 min/week=score 1), smoking status (past/current smoker=score 0; never smoker=score 1), alcohol intake (≤14 drinks/week=score 0; >14 drinks/week=score 1), sleep (>7-<9 hours/day=score 0; <7 hours/day or >9 hours/day=score 1), fruit and vegetable intake (<2 serves of fruit/day and <3 serves of fruit/day=score 0; ≥2 serves of fruit/day and ≥3 serves of vegetables/day=score 1). Based on the

sum of these scores, the healthy lifestyle index was dichotomised as either healthy (sum of scores=5-6) or not healthy (sum of scores=0-4).

§§ 1 missing.

||| 6 missing.

¶¶ 1,571 missing.

\*\*\* 9 missing.

††† 9 missing.

## 9 missing.

**Table S2. Hazard ratios and 95% confidence intervals for the incidence of CVD hospitalisation and mortality in parous women, by breastfeeding history.**

| <b>Breastfeeding history</b>   | <b>No. of persons, n</b> | <b>Person-years from baseline</b> | <b>No. of incident cases/deaths</b> | <b>Model 1*<br/>(95% CI)</b> | <b>Model 2†<br/>(95% CI)</b> | <b>Model 3‡<br/>(95% CI)</b> | <b>Model 4§<br/>(95% CI)</b> |
|--------------------------------|--------------------------|-----------------------------------|-------------------------------------|------------------------------|------------------------------|------------------------------|------------------------------|
| <i>CVD hospitalisation</i>     |                          |                                   |                                     |                              |                              |                              |                              |
| <b>Parous, Never breastfed</b> | 12,517                   | 76,164                            | 527                                 | Reference                    | Reference                    | Reference                    | Reference                    |
| <b>Parous, Ever breastfed</b>  | 88,347                   | 540 696                           | 2,901                               | 0.81 (0.73,0.89)             | 0.83 (0.75,0.91)             | 0.85 (0.77,0.95)             | 0.86 (0.78,0.96)             |
| <b>P-value<sup>  </sup></b>    |                          |                                   |                                     | <0.001                       | <0.001                       | 0.003                        | 0.005                        |
| <i>CVD mortality</i>           |                          |                                   |                                     |                              |                              |                              |                              |

|                                |        |         |     |                  |                  |                  |                  |
|--------------------------------|--------|---------|-----|------------------|------------------|------------------|------------------|
| <b>Parous, Never breastfed</b> | 12,517 | 71 730  | 66  | Reference        | Reference        | Reference        | Reference        |
| <b>Parous, Ever breastfed</b>  | 88,347 | 506,383 | 352 | 0.65 (0.49,0.85) | 0.69 (0.52,0.91) | 0.66 (0.50,0.89) | 0.66 (0.49,0.89) |
| <b>P-value<sup>  </sup></b>    |        |         |     | 0.002            | 0.008            | 0.006            | 0.006            |

CI= confidence interval, CVD=cardiovascular disease.

\* Model 1 was unadjusted.

† Model 2 was adjusted for parity (number of children) and socio-demographic characteristics (age, country of birth, educational level, marital status, area-level socio-economic status).

‡ Model 3 was further adjusted for lifestyle factors: body mass index, smoking status, alcohol intake, physical activity.

§ Model 4 was additionally adjusted for medical and reproductive covariates: multi-vitamin use, omega 3 or fish oil use, use of aspirin, oral contraceptive use, mother's age for first child, mother's age for last child, family history of CVD, family history of hypertension, family history of diabetes, self-reported hypertension/recent treatment for hypertension, and self-reported diabetes/recent treatment for diabetes.

|| From Type 3 Wald chi-square test.



**Table S3. Adjusted hazard ratios and 95% confidence intervals for associations between average breastfeeding duration per child and the incidence of CVD hospitalisation and mortality in parous women, stratified by highest educational level.**

| <b>Highest educational level</b>                         | <b>Average breastfeeding duration per child</b> | <b>No. of persons, n</b> | <b>Person-years from baseline (from birth of first child)</b> | <b>No. of incident cases/deaths</b> | <b>Multivariate-adjusted* (95% CI)</b> |
|----------------------------------------------------------|-------------------------------------------------|--------------------------|---------------------------------------------------------------|-------------------------------------|----------------------------------------|
| <i>CVD hospitalisation</i>                               |                                                 |                          |                                                               |                                     |                                        |
| University and higher                                    | <b>Never breastfed</b>                          | 1,362                    | 8,364                                                         | 38                                  | Reference                              |
|                                                          | <b>&gt;0-6 months</b>                           | 9,915                    | 61,035                                                        | 239                                 | 0.90 (0.62, 1.30)                      |
|                                                          | <b>&gt;6-12 months</b>                          | 7,462                    | 46,238                                                        | 111                                 | 0.81 (0.55, 1.20)                      |
|                                                          | <b>&gt;12 months</b>                            | 3,383                    | 21,027                                                        | 39                                  | 0.92 (0.57, 1.48)                      |
| High school/trade apprenticeship/<br>certificate/diploma | <b>Never breastfed</b>                          | 4,089                    | 24,986                                                        | 152                                 | Reference                              |
|                                                          | <b>&gt;0-6 months</b>                           | 20,696                   | 126,795                                                       | 680                                 | 0.89 (0.74, 1.08)                      |

|                       |                        |        |         |       |                   |
|-----------------------|------------------------|--------|---------|-------|-------------------|
|                       | <b>&gt;6-12 months</b> | 9,730  | 59,834  | 238   | 0.83 (0.66, 1.03) |
|                       | <b>&gt;12 months</b>   | 3,101  | 19,141  | 49    | 0.94 (0.66, 1.33) |
| ≤10 years             | <b>Never</b>           | 6,830  | 41,444  | 320   | Reference         |
|                       | <b>breastfed</b>       |        |         |       |                   |
|                       | <b>&gt;0-6 months</b>  | 24,669 | 149,919 | 1,113 | 0.85 (0.74, 0.97) |
|                       | <b>&gt;6-12 months</b> | 7,098  | 42,878  | 348   | 0.90 (0.76, 1.07) |
|                       | <b>&gt;12 months</b>   | 1,204  | 7,374   | 25    | 0.75 (0.48, 1.18) |
| <i>CVD mortality</i>  |                        |        |         |       |                   |
| University and higher | <b>Never</b>           | 1,362  | 7,808   | <5    | Reference         |
|                       | <b>breastfed</b>       |        |         |       |                   |
|                       | <b>&gt;0-6 months</b>  | 9,915  | 56,884  | 20    | 0.66 (0.19, 2.26) |
|                       | <b>&gt;6-12 months</b> | 7,462  | 42,910  | <5    | 0.28 (0.06, 1.27) |
|                       | <b>&gt;12 months</b>   | 3,383  | 19,477  | 0     | -                 |

|                                                             |                        |        |         |     |                   |
|-------------------------------------------------------------|------------------------|--------|---------|-----|-------------------|
| High school/trade<br>apprenticeship/<br>certificate/diploma | <b>Never</b>           | 4,089  | 23,470  | 20  | Reference         |
|                                                             | <b>breastfed</b>       |        |         |     |                   |
|                                                             | <b>&gt;0-6 months</b>  | 20,696 | 118,767 | 63  | 0.51 (0.30, 0.87) |
|                                                             | <b>&gt;6-12 months</b> | 9,730  | 55,765  | 32  | 0.65 (0.36, 1.17) |
|                                                             | <b>&gt;12 months</b>   | 3,101  | 17,769  | <5  | 0.26 (0.03, 1.94) |
| ≤10 years                                                   | <b>Never</b>           | 6,830  | 39,118  | 41  | Reference         |
|                                                             | <b>breastfed</b>       |        |         |     |                   |
|                                                             | <b>&gt;0-6 months</b>  | 24,669 | 141,360 | 154 | 0.77 (0.53, 1.13) |
|                                                             | <b>&gt;6-12 months</b> | 7,098  | 40,484  | 51  | 0.52 (0.33, 0.84) |
|                                                             | <b>&gt;12 months</b>   | 1,204  | 6,860   | 6   | 1.06 (0.37, 3.02) |

CI= confidence interval, CVD=cardiovascular disease.

\* Adjusted for age, country of birth, educational level, marital status, area-level socio-economic status, body mass index, smoking status, alcohol intake, physical activity, multi-vitamin use, omega 3 or fish oil use, use of aspirin, oral contraceptive use, number of children, mother's age for first child, mother's age for last child, family history of CVD, family history of hypertension, family history of diabetes, self-reported hypertension/recent treatment for hypertension, and self-reported diabetes/recent treatment for diabetes.

**Table S4. Adjusted hazard ratios and 95% confidence intervals for associations between average breastfeeding duration per child and the incidence of CVD hospitalisation and mortality in parous women, stratified by the healthy lifestyle index.**

| <b>Healthy lifestyle index*</b> | <b>Average breastfeeding duration per child†</b> | <b>No. of persons, n</b> | <b>Person-years from baseline (from birth of first child)</b> | <b>No. of incident cases/deaths</b> | <b>Multivariate-adjusted‡ (95% CI)</b> |
|---------------------------------|--------------------------------------------------|--------------------------|---------------------------------------------------------------|-------------------------------------|----------------------------------------|
| <i>CVD hospitalisation</i>      |                                                  |                          |                                                               |                                     |                                        |
| Healthy                         | <b>Never breastfed</b>                           | 2,812                    | 17,354                                                        | 77                                  | Reference                              |
|                                 | <b>&gt;0-6 months</b>                            | 15,724                   | 96,582                                                        | 490                                 | 1.11 (0.87, 1.42)                      |
|                                 | <b>&gt;6-12 months</b>                           | 8,652                    | 53,261                                                        | 197                                 | 1.01 (0.77, 1.32)                      |
|                                 | <b>&gt;12 months</b>                             | 2,948                    | 18,230                                                        | 37                                  | 1.15 (0.77, 1.72)                      |
| Not healthy                     | <b>Never breastfed</b>                           | 7,487                    | 45,413                                                        | 345                                 | Reference                              |
|                                 | <b>&gt;0-6 months</b>                            | 31,297                   | 191,309                                                       | 1,157                               | 0.79 (0.70, 0.90)                      |

|                      |                        |        |         |     |                   |
|----------------------|------------------------|--------|---------|-----|-------------------|
|                      | <b>&gt;6-12 months</b> | 12,485 | 76,576  | 371 | 0.80 (0.68, 0.93) |
|                      | <b>&gt;12 months</b>   | 3,836  | 23,718  | 61  | 0.82 (0.62, 1.09) |
| <i>CVD mortality</i> |                        |        |         |     |                   |
| Healthy              | <b>Never breastfed</b> | 2,812  | 16,201  | 10  | Reference         |
|                      | <b>&gt;0-6 months</b>  | 15,724 | 90,369  | 43  | 0.68 (0.34, 1.36) |
|                      | <b>&gt;6-12 months</b> | 8,652  | 49,616  | 15  | 0.40 (0.18, 0.90) |
|                      | <b>&gt;12 months</b>   | 2,948  | 16,894  | <5  | 0.93 (0.20, 4.31) |
| Not healthy          | <b>Never breastfed</b> | 7,487  | 42,853  | 39  | Reference         |
|                      | <b>&gt;0-6 months</b>  | 31,297 | 179,631 | 130 | 0.68 (0.47, 0.99) |
|                      | <b>&gt;6-12 months</b> | 12,485 | 71,602  | 48  | 0.59 (0.38, 0.92) |
|                      | <b>&gt;12 months</b>   | 3,836  | 22,019  | <5  | 0.57 (0.18, 1.88) |

CI= confidence interval, CVD=cardiovascular disease.

\* Based on six lifestyle risk factors scored individually as either healthy (score=1) or not healthy (score=0): body mass index (<25 kg/m<sup>2</sup>=score 1, ≥25 kg/m<sup>2</sup>=score 0), physical activity level (<150 min/week=score 0; ≥150 min/week=score 1), smoking status (past/current smoker=score 0; never smoker=score 1), alcohol intake (≤14 drinks/week=score 0; >14 drinks/week=score 1), sleep (>7-<9 hours/day=score 0; <7 hours/day or >9 hours/day=score 1), fruit and vegetable intake (<2 serves of fruit/day and <3 serves of fruit/day=score 0; ≥2 serves of fruit/day and ≥3 serves of vegetables/day=score 1). Based on the sum of these scores, the healthy lifestyle index was dichotomised as either healthy (sum of scores=5-6) or not healthy (sum of scores=0-4).

† Average breastfeeding duration per child was calculated as self-reported lifetime breastfeeding duration divided by the reported number of children.

‡ Adjusted for age, country of birth, educational level, marital status, area-level socio-economic status, multi-vitamin use, omega 3 or fish oil use, use of aspirin, oral contraceptive use, number of children, mother's age for first child, mother's age for last child, family history of CVD, family history of hypertension, family history of diabetes, self-reported hypertension/recent treatment for hypertension, and self-reported diabetes/recent treatment for diabetes.

**Table S5. Summary of recent prospective/case-cohort studies that have examined the association between breastfeeding history/duration and CVD outcomes.**

| <b>First author<br/>(year)</b>  | <b>Country<br/>and cohort<br/>designation</b> | <b>Participants</b>                                                                                          | <b>Mean<br/>follow-<br/>up<br/>(years)</b> | <b>Outcome<br/>assessment</b>                                                           | <b>Breastfeeding<br/>comparison<br/>categories</b> | <b>Adjusted HR (95% CI)<br/>by breastfeeding<br/>history/ duration</b>                                                 | <b>Covariates</b>                                                                                                |
|---------------------------------|-----------------------------------------------|--------------------------------------------------------------------------------------------------------------|--------------------------------------------|-----------------------------------------------------------------------------------------|----------------------------------------------------|------------------------------------------------------------------------------------------------------------------------|------------------------------------------------------------------------------------------------------------------|
| Merritt et al.<br>(2015)<br>[1] | 10<br>European<br>countries,<br>EPIC study    | 322,972 parous women<br>without a history of<br>MI/heart attack, angina,<br>stroke or cancer;<br>25-70 years | 12.9                                       | Mortality from:<br><br>Circulatory disease<br><br>Cerebrovascular<br>disease<br><br>IHD | Never<br><br>Ever<br><br>Never<br><br>Ever         | Reference<br><br>0.80 (0.70, 0.91)<br><br>Reference<br><br>0.94 (0.74, 1.21)<br><br>Reference<br><br>0.69 (0.54, 0.87) | Education level, BMI,<br>physical activity,<br>smoking<br>status/intensity and<br>duration, menopausal<br>status |

---

|                                |    |                                                                                                                                                                                                       |    |                                                   |                                                                                                                                    |                                                                                                                                                         |                                                                                                                                                                       |
|--------------------------------|----|-------------------------------------------------------------------------------------------------------------------------------------------------------------------------------------------------------|----|---------------------------------------------------|------------------------------------------------------------------------------------------------------------------------------------|---------------------------------------------------------------------------------------------------------------------------------------------------------|-----------------------------------------------------------------------------------------------------------------------------------------------------------------------|
| Peters et al.<br>(2016)<br>[2] | 10 | Parous women without a history of IHD or stroke; mean age=52.7 (SD: 9.1) years; n=8,044 for analyses comparing never vs. ever breastfeeding and n=8,012 for analyses involving breastfeeding duration | 11 | Incidence of first-time non-fatal/fatal IHD event | Never<br>Ever<br><br>Average breastfeeding duration/child<br><br>Never<br>>0-<1 month<br>≥1-<3 months<br>≥3-<6 months<br>≥6 months | Reference<br><br>0.71 (0.52, 0.98)<br><br><br><br>1.00 (0.73, 1.37)<br>0.77 (0.63, 0.94)<br>0.69 (0.61, 0.78)<br>0.67 (0.57, 0.77)<br>0.67 (0.56, 0.80) | Study centre, age, education level, BMI, smoking status, number of live births, high blood pressure, HDL cholesterol, total cholesterol, history of diabetes mellitus |
|--------------------------------|----|-------------------------------------------------------------------------------------------------------------------------------------------------------------------------------------------------------|----|---------------------------------------------------|------------------------------------------------------------------------------------------------------------------------------------|---------------------------------------------------------------------------------------------------------------------------------------------------------|-----------------------------------------------------------------------------------------------------------------------------------------------------------------------|

---



|                                |                                                                    |                                                               |                 |               |                                    |                   |                                                                                                                                                                                                   |
|--------------------------------|--------------------------------------------------------------------|---------------------------------------------------------------|-----------------|---------------|------------------------------------|-------------------|---------------------------------------------------------------------------------------------------------------------------------------------------------------------------------------------------|
| Peters et al.<br>(2017)<br>[3] | 10 diverse<br>regions in<br>China,<br>China<br>Kadoorie<br>Biobank | 289,573 without a<br>history of IHD or stroke;<br>30-79 years | 8.1<br>(median) | Incidence of: |                                    |                   | Education level,<br>household income,<br>BMI, physical activity,<br>smoking status,<br>alcohol intake,<br>systolic blood<br>pressure, history of<br>hypertension, history<br>of diabetes mellitus |
|                                |                                                                    |                                                               |                 | All CVD       | Never                              | 1.00 (0.95, 1.05) |                                                                                                                                                                                                   |
|                                |                                                                    |                                                               |                 |               | Ever                               | 0.96 (0.95, 0.97) |                                                                                                                                                                                                   |
|                                |                                                                    |                                                               |                 |               | Each additional<br>6 months/child* | 0.98 (0.97, 0.99) |                                                                                                                                                                                                   |
|                                |                                                                    |                                                               |                 | Major CVD     | Never                              | 1.00 (0.92, 1.09) |                                                                                                                                                                                                   |
|                                |                                                                    |                                                               |                 |               | Ever                               | 0.88 (0.87, 0.90) |                                                                                                                                                                                                   |
|                                |                                                                    |                                                               |                 |               | Each additional<br>6 months/child* | 0.97 (0.96, 0.99) |                                                                                                                                                                                                   |
|                                |                                                                    |                                                               |                 | Fatal CVD     | Never                              | 1.00 (0.77, 1.29) |                                                                                                                                                                                                   |

---

|                        |                                    |                   |
|------------------------|------------------------------------|-------------------|
|                        | Ever                               | 0.90 (0.87, 0.94) |
|                        | Each additional<br>6 months/child* | 0.98 (0.95, 1.01) |
| Stroke                 | Never                              | 1.00 (0.93, 1.08) |
|                        | Ever                               | 0.92 (0.90, 0.93) |
|                        | Each additional<br>6 months/child* | 0.97 (0.96, 0.98) |
| Haemorrhagic<br>stroke | Never                              | 1.00 (0.77, 1.31) |
|                        | Ever                               | 0.84 (0.81, 0.88) |

---

---

|                 |                                    |                   |
|-----------------|------------------------------------|-------------------|
|                 | Each additional<br>6 months/child* | 0.99 (0.96, 1.03) |
| Ischemic stroke | Never                              | 1.00 (0.91, 1.09) |
|                 | Ever                               | 0.88 (0.86, 0.90) |
|                 | Each additional<br>6 months/child* | 0.97 (0.95, 0.98) |
| IHD             | Never                              | 1.00 (0.92, 1.09) |
|                 | Ever                               | 0.91 (0.89, 0.93) |
|                 | Each additional<br>6 months/child* | 0.96 (0.95, 0.98) |

---

BMI=body mass index, CVD=cardiovascular disease, EPIC=European Investigation into Cancer and Nutrition prospective cohort study, HDL=high-density lipoprotein, HR=hazard ratio, IHD=ischaemic heart disease, MI=myocardial infarction, SD=standard deviation.

\* Among parous women that had ever breastfed.

## Supplemental References:

1. Merritt MA, Riboli E, Murphy N, Kadi M, Tjønneland A, Olsen A, Overvad K, Dossus L, Dartois L, Clavel-Chapelon F, Fortner RT, Katzke VA, Boeing H, Trichopoulou A, Lagiou P, Trichopoulos D, Palli D, Sieri S, Turnino R, Sacerdote C, Panico S, Bueno-de-Mesquita HB, Peeters PH, Lund E, Nakamura A, Weiderpass E, Quirós JR, Agudo A, Molina-Montes E, Larrañaga N, Dorronsoro M, Cirera L, Barricarte A, Olsson A, Butt S, Idahl A, Lundin E, Wareham NJ, Key TJ, Brennan P, Ferrari P, Wark PA, Norat T, Cross AJ, Gunter MJ. Reproductive factors and risk of mortality in the European Prospective Investigation into Cancer and Nutrition; a cohort study. *BMC Med.* 2015;13:252.
2. Peters SAE, van der Schouw YT, Wood AM, Sweeting MJ, Moons KG, Weiderpass E, Arriola L, Benetou V, Boeing H, Bonnet F, Butt ST, Clavel-Chapelon F, Drake I, Gavrila D, Key TJ, Klinaki E, Krogh V, Kühn T, Lassale C, Masala G, Matullo G, Merritt M, Molina-Portillo E, Moreno-Iribas C, Nøst TH, Olsen A, Onland-Moret NC, Overvad K, Panico S, Redondo ML, Tjønneland A, Trichopoulou A, Tumino R, Turzanski-Fortner R, Tzoulaki I, Wennberg P, Winkvist A, Thompson SG, Di Angelantonio E, Riboli E, Wareham NJ, Danesh J, Butterworth AS. Parity, breastfeeding and risk of coronary heart disease: A pan-European case-cohort study. *Eur J Prev Cardiol.* 2016;23:1755-1765.
3. Peters SAE, Yang L, Guo Y, Chen Y, Bian Z, Du J, Yang J, Li S, Li L, Woodward M, Chen Z. Breastfeeding and the risk of maternal cardiovascular disease: A prospective study of 300,000 Chinese women. *J Am Heart Assoc.* 2017;6:e006081. doi: 10.1161/JAHA.117.006081.
